# Supplementary material
Source: publisher site journal article supplement (http://kjim.org/upload/media/kjim-2021-088-suppl11.pdf)
Supplement: Supplementary file 1 [file kjim-2021-088-suppl11.pdf]

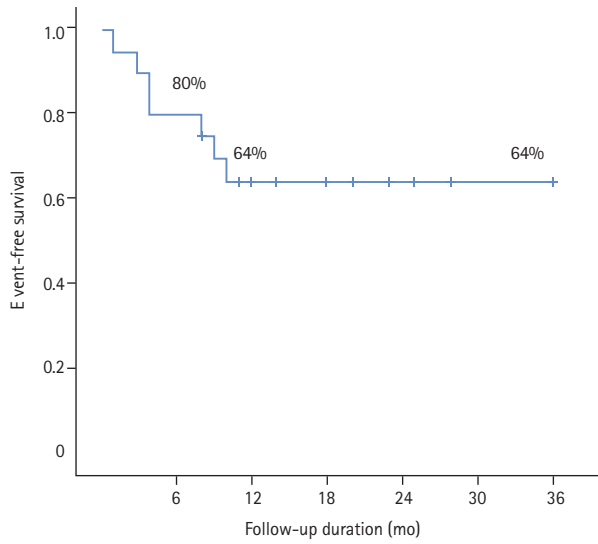

| Months    | 0  | 6  | 12 | 18 | 24 | 30 | 36 |
|-----------|----|----|----|----|----|----|----|
| # at risk | 20 | 16 | 11 | 9  | 6  | 4  | 4  |

**Supplementary Figure 3.** Survival free from disabling stroke, reoperation or death in destination therapy patients. Event-free survival up to 3 years. Estimated survival rates are given at 6, 12, and 36 months.
